# Supplementary material for: Tuning emission color and improving the warm-white persistent luminescence of phosphor BaLu2Al2Ga2SiO12:Pr3+via Zn2+ co-doping
Source: Royal Society of Chemistry journal article supplement (doi:10.1039/d1dt01913a), 2021-01-01
Supplement: d1dt01913a1.pdf [file d1dt01913a1.pdf]

## Supporting Information

### **Tuning emission color and improving warm-white persistent luminescence of phosphor $\text{BaLu}_2\text{Al}_2\text{Ga}_2\text{SiO}_{12}:\text{Pr}^{3+}$ via $\text{Zn}^{2+}$ co-doping**

Weihong Yuan,<sup>a,b</sup> Ran Pang,<sup>\*a</sup> Tao Tan,<sup>a,b</sup> Haiyan Wu,<sup>a,b</sup> Shangwei Wang,<sup>a</sup> Jiangyue Su,<sup>a,b</sup> Jiutian Wang,<sup>a,b</sup> Shengjian Jiao,<sup>a,b</sup> Chengyu Li<sup>\*a,b</sup> and Hongjie Zhang<sup>a,c</sup>

<sup>a</sup> *State key Laboratory of Rare Earth Resource Utilization, Changchun Institute of Applied Chemistry, Chinese Academy of Sciences, Changchun 130022, P. R. China*

<sup>b</sup> *University of Science and Technology of China, Hefei 230026, China*

<sup>c</sup> *The GBA National Institute for Nanotechnology Innovation, Guangzhou 510535, China*

*\* Corresponding author: Tel: +86-0431-85262258*

*E-mail address: cyli@ciac.ac.cn and pangran@ciac.ac.cn*

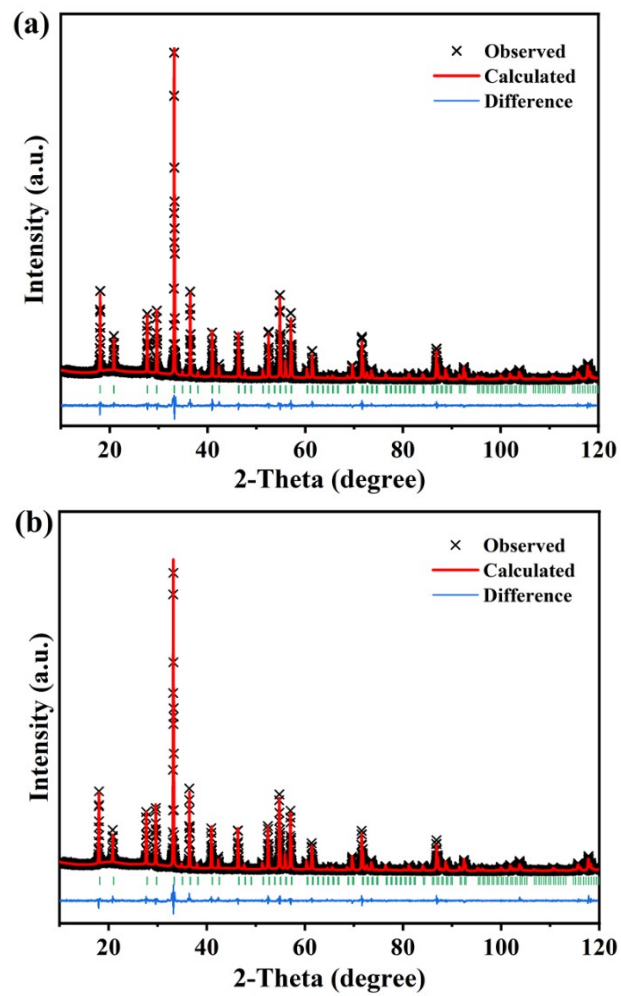

Fig. S1 XRD profiles for the Rietveld refinement result of (a) BLAGSO and (b) BLAGSO:0.04Pr<sup>3+</sup>

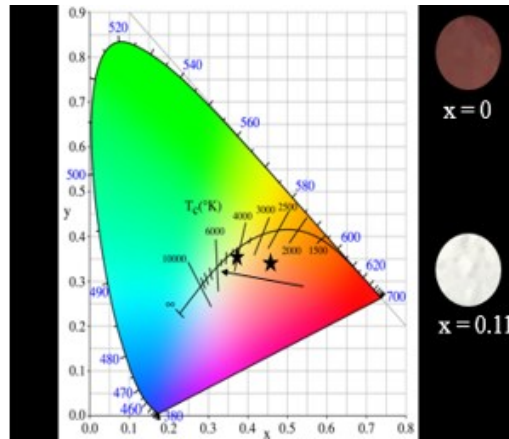

**Fig. S2** The Commission Internationale de l'Eclairage (CIE) coordinates of BLAGSO:0.04Pr<sup>3+</sup>, xZn<sup>2+</sup> (x = 0, 0.11) samples under 254 nm lamp irradiation.

**Table S1** Rietveld fitting results of BLAGSO, BLAGSO:0.04Pr<sup>3+</sup> and  
BLAGSO:0.04Pr<sup>3+</sup>, 0.11Zn<sup>2+</sup>

| Formula                         | BLAGSO                                | BLAGSO:0.04Pr <sup>3+</sup>           | BLAGSO:0.04Pr <sup>3+</sup> , 0.11Zn <sup>2+</sup> |
|---------------------------------|---------------------------------------|---------------------------------------|----------------------------------------------------|
| crystal system                  | cubic                                 | cubic                                 | cubic                                              |
| space group                     | <i>Ia</i> <sup>3</sup> <i>d</i> (230) | <i>Ia</i> <sup>3</sup> <i>d</i> (230) | <i>Ia</i> <sup>3</sup> <i>d</i> (230)              |
| a (Å)                           | 12.0669                               | 12.0786                               | 12.0699                                            |
| b (Å)                           | 12.0669                               | 12.0786                               | 12.0699                                            |
| c (Å)                           | 12.0669                               | 12.0786                               | 12.0699                                            |
| $\alpha = \beta = \gamma$ (deg) | 90                                    | 90                                    | 90                                                 |
| Z                               | 8                                     | 8                                     | 8                                                  |
| V (Å <sup>3</sup> )             | 1757.075                              | 1762.175                              | 1758.374                                           |
| Rp                              | 0.0447                                | 0.0452                                | 0.0430                                             |
| Rwp                             | 0.0611                                | 0.0623                                | 0.0575                                             |
| $\chi^2$                        | 2.849                                 | 2.969                                 | 2.473                                              |

**Table S2** Atomic positions of BLAGSO

| atom | site | x        | y       | z       | Occupancy | U <sub>iso</sub> |
|------|------|----------|---------|---------|-----------|------------------|
| Ba1  | 24c  | 0.125    | 0       | 0.25    | 0.3330    | 0.00612          |
| Lu1  | 24c  | 0.125    | 0       | 0.25    | 0.6670    | 0.01100          |
| Al1  | 16a  | 0        | 0       | 0       | 0.5450    | 0.01538          |
| Ga1  | 16a  | 0        | 0       | 0       | 0.4550    | 0.00777          |
| Al2  | 24d  | 0.375    | 0       | 0.25    | 0.3033    | 0.02568          |
| Ga2  | 24d  | 0.375    | 0       | 0.25    | 0.3634    | 0.01255          |
| Si1  | 24d  | 0.375    | 0       | 0.25    | 0.3333    | 0.00456          |
| O1   | 96h  | -0.03879 | 0.04806 | 0.15408 | 1.0000    | 0.02588          |

**Table S3** Atomic positions of BLAGSO:0.04Pr<sup>3+</sup>

| atom | site | x        | y       | z       | Occupancy | U <sub>iso</sub> |
|------|------|----------|---------|---------|-----------|------------------|
| Ba1  | 24c  | 0.125    | 0       | 0.25    | 0.3330    | 0.02204          |
| Lu1  | 24c  | 0.125    | 0       | 0.25    | 0.6540    | 0.01658          |
| Pr1  | 24c  | 0.125    | 0       | 0.25    | 0.0130    | 0.01610          |
| Al1  | 16a  | 0        | 0       | 0       | 0.5450    | 0.03068          |
| Ga1  | 16a  | 0        | 0       | 0       | 0.4550    | 0.01394          |
| Al2  | 24d  | 0.375    | 0       | 0.25    | 0.3033    | 0.00112          |
| Ga2  | 24d  | 0.375    | 0       | 0.25    | 0.3634    | 0.00153          |
| Si1  | 24d  | 0.375    | 0       | 0.25    | 0.3333    | 0.02567          |
| O1   | 96h  | -0.03656 | 0.04779 | 0.15299 | 1.0000    | 0.05205          |

**Table S4** Atomic positions of BLAGSO:0.04Pr<sup>3+</sup>, 0.11Zn<sup>2+</sup>

| atom | site | x        | y       | z       | Occupancy | U <sub>iso</sub> |
|------|------|----------|---------|---------|-----------|------------------|
| Ba1  | 24c  | 0.125    | 0       | 0.25    | 0.2964    | 0.01560          |
| Lu1  | 24c  | 0.125    | 0       | 0.25    | 0.654     | 0.01896          |
| Zn1  | 24c  | 0.125    | 0       | 0.25    | 0.0366    | 0.01237          |
| Pr1  | 24c  | 0.125    | 0       | 0.25    | 0.0130    | 0.02120          |
| Al1  | 16a  | 0        | 0       | 0       | 0.5450    | 0.02435          |
| Ga1  | 16a  | 0        | 0       | 0       | 0.4550    | 0.01893          |
| Al2  | 24d  | 0.375    | 0       | 0.25    | 0.3033    | 0.02568          |
| Ga2  | 24d  | 0.375    | 0       | 0.25    | 0.3634    | 0.00064          |
| Si1  | 24d  | 0.375    | 0       | 0.25    | 0.3333    | 0.02512          |
| O1   | 96h  | -0.03656 | 0.04779 | 0.15299 | 1.0000    | 0.06109          |

**Table S5** Atomic distance of BLAGSO:0.04Pr<sup>3+</sup> and BLAGSO:0.04Pr<sup>3+</sup>, 0.11Zn<sup>2+</sup>

|                                                    | Atom 1         | Atom 2         | Distance (Å) |
|----------------------------------------------------|----------------|----------------|--------------|
| BLAGSO:0.04Pr <sup>3+</sup>                        | Lu1/Ba1/Pr     | Lu1/Ba1/Pr     | 3.6983       |
|                                                    | Lu1/Ba1/Pr     | Ga2/Si1/Al2    | 3.0196       |
|                                                    | Lu1/Ba1/Pr     | Ga2/Si1/Al2    | 3.6983       |
|                                                    | Lu1/Ba1/Pr     | Al1/Ga1        | 3.3761       |
|                                                    | Lu1/Ba1/Pr     | O1             | 2.3483       |
|                                                    | Lu1/Ba1/Pr     | O1             | 2.5049       |
|                                                    | Al1/Ga1        | O1             | 1.9856       |
|                                                    | Ga2/Si1/Al2    | O1             | 1.6875       |
| BLAGSO:0.04Pr <sup>3+</sup> , 0.11Zn <sup>2+</sup> | Lu1/Ba1/Zn1/Pr | Lu1/Ba1/Zn1/Pr | 3.6956       |
|                                                    | Lu1/Ba1/Zn1/Pr | Ga2/Si1/Al2    | 3.0175       |
|                                                    | Lu1/Ba1/Zn1/Pr | Ga2/Si1/Al2    | 3.6956       |
|                                                    | Lu1/Ba1/Zn1/Pr | Al1/Ga1        | 3.3736       |
|                                                    | Lu1/Ba1/Zn1/Pr | O1             | 2.341        |
|                                                    | Lu1/Ba1/Zn1/Pr | O1             | 2.4939       |
|                                                    | Al1/Ga1        | O1             | 1.9828       |
|                                                    | Ga2/Si1/Al2    | O1             | 1.6961       |
